# Supplementary material
Source: HighWire-hosted journal article supplement (https://cmaj.ca/highwire/filestream/58892/field_highwire_adjunct_files/3/pressure-lv-4-at.pdf)

## Appendix 4 (as supplied by the authors): Subgroup analysis of intensive blood pressure lowering on kidney failure

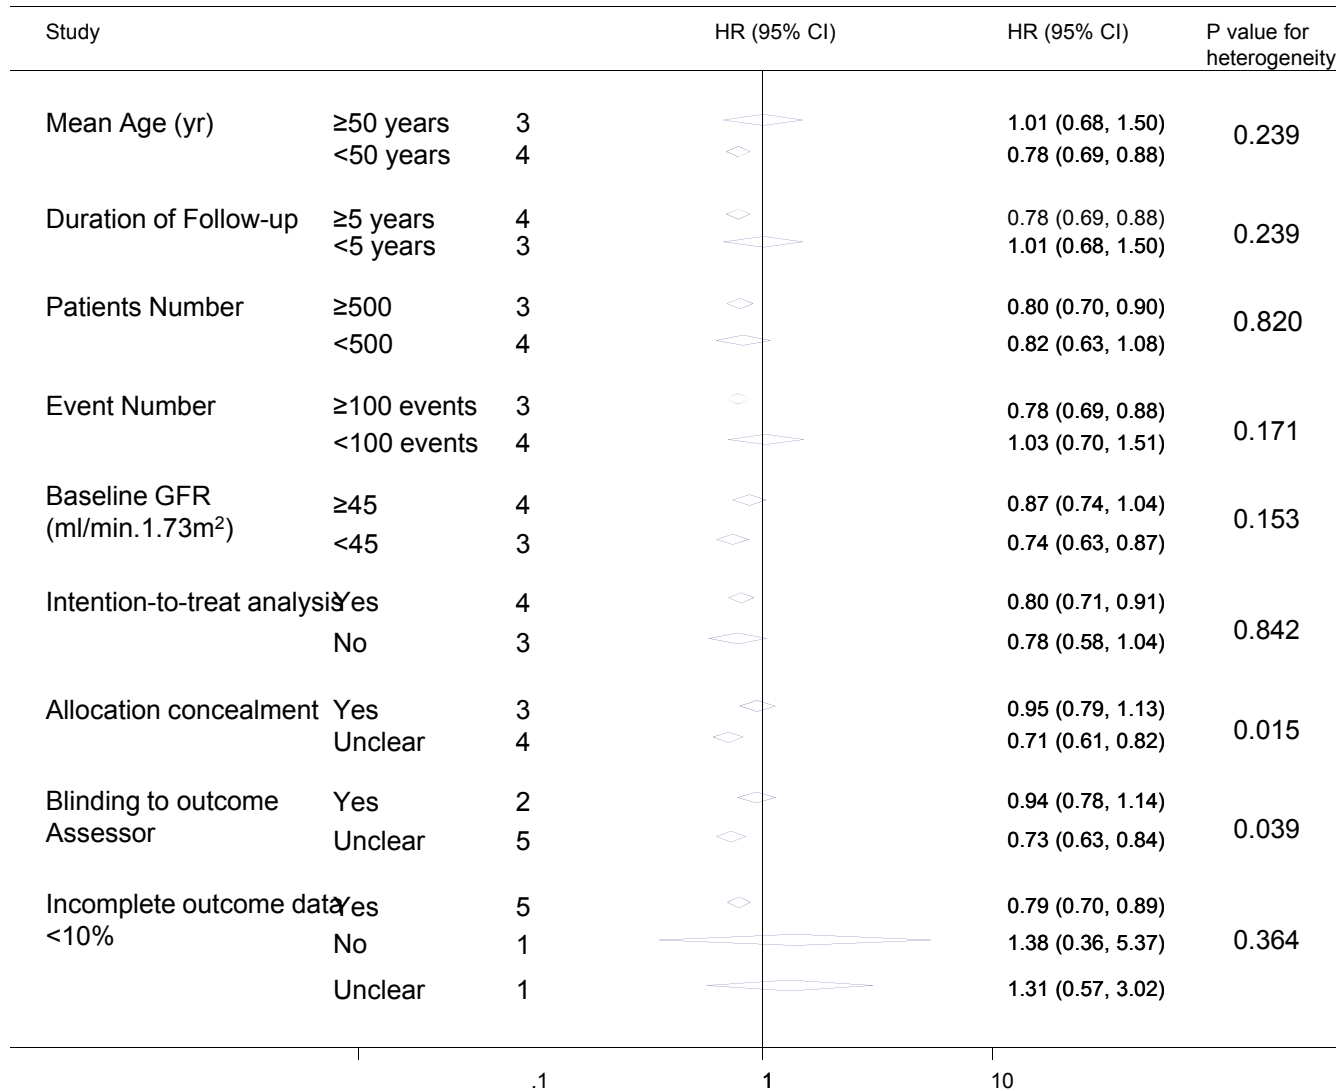

Supplement: pressure-lv-4-at.pdf [file pressure-lv-4-at.pdf]
